# Supplementary material for: Capacitive CO2 sensor made of aminated cellulose nanofibrils: development and optimization
Source: Royal Society of Chemistry journal article supplement (doi:10.1039/d4nj00508b), 2024-01-01
Supplement: d4nj00508b2.pdf [file d4nj00508b2.pdf]

## Supplementary Information

### Capacitive CO<sub>2</sub> sensor made of aminated cellulose nanofibrils: Development and optimization

Frédéric Héraly, Anirban Sikdar, Jian Chang, Jiayin Yuan\*

Department of Materials and Environmental Chemistry, Stockholm University, Svante Arrheniusväg 16C, Stockholm  
106 91, Sweden .

\* Corresponding author: Jiayin Yuan, Email: [Jiayin.Yuan@mmk.su.se](mailto:Jiayin.Yuan@mmk.su.se)

## Supplementary Figures

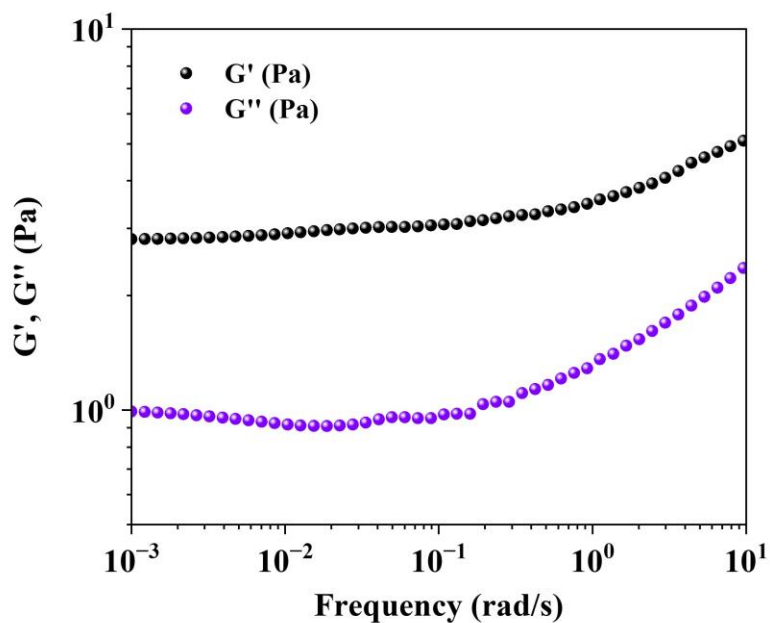

**Figure S1.** Rheological behavior of the APDEMS-CNFs spinning dope as a function of frequency.

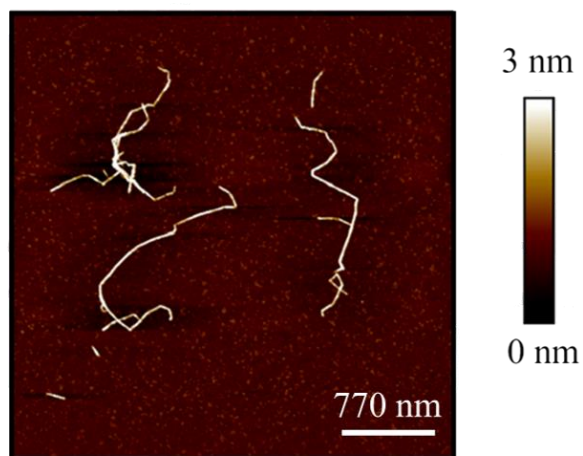

**Figure S2.** Atomic force microscopy (AFM) height image depicting the nanoscale structure and prominent aspect ratio of CNFs.

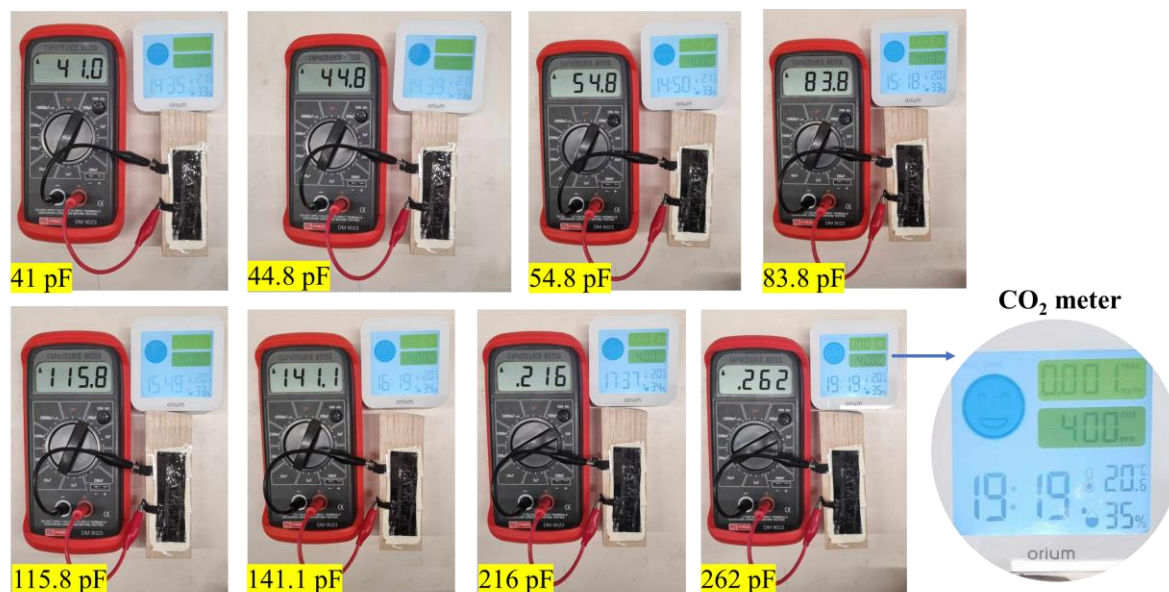

**Figure S3.** Temporal variation of capacitance for A-CNFs@DE exposed to 400 ppm CO<sub>2</sub>.

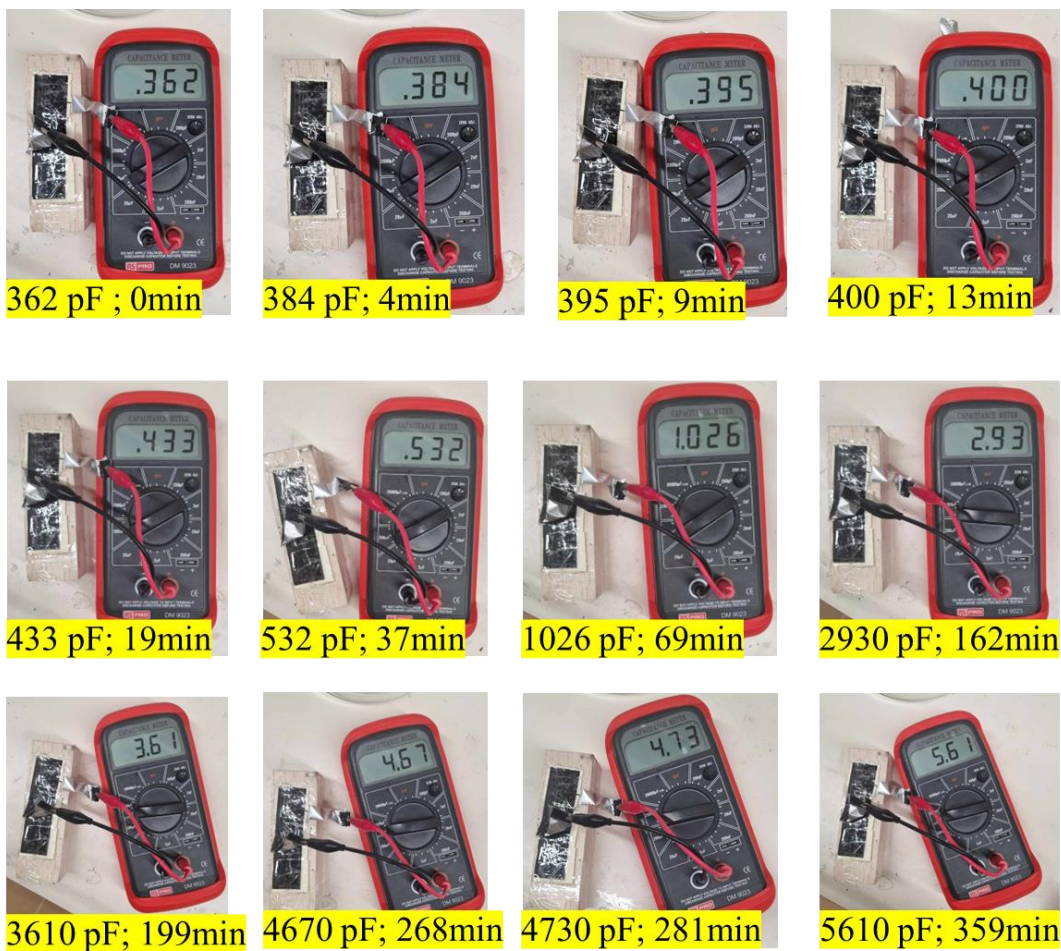

**Figure S4.** Temporal variation of capacitance for A-CNFs-DBU@DE exposed to 400 ppm CO<sub>2</sub>.

## Supplementary Tables

**Table S1.** Comparative analysis of the maximum CO<sub>2</sub> uptake capacities for various amine-based adsorbents found in the literature and FD-APDEMS-CNFs sample presented in this study.

| Amine-based adsorbent | Maximum CO <sub>2</sub> adsorption (mmol/g) | Ref.      |
|-----------------------|---------------------------------------------|-----------|
| TRI-PE-MCM-41         | 0.90                                        | [S1]      |
| HAS6                  | 1.72                                        | [S2]      |
| PEI/silica            | 2.36                                        | [S2]      |
| T-PEI/silica          | 2.19                                        | [S2]      |
| AEAPDMS-CNF           | 1.39                                        | [S3]      |
| PEI-CNF               | 2.22                                        | [S4]      |
| CH-CNF-DAMO           | 0.89                                        | [S5]      |
| OH-CNF-DAMO           | 1.27                                        | [S5]      |
| KP-CNF-DAMO           | 2.11                                        | [S5]      |
| FD-APDEMS-CNFs        | 3.2                                         | This work |

## References

- S1. Y. Belmabkhout, R. Serna-Guerrero and A. Sayari, *Chemical Engineering Science*, 2010, **65**, 3695-3698.
- S2. S. Choi, J. H. Drese, P. M. Eisenberger and C. W. Jones, *Environmental Science Technology*, 2011, **45**, 2420-2427.
- S3. C. Gebald, J. A. Wurzbacher, P. Tingaut, T. Zimmermann and A. Steinfeld, *Environmental Science Technology*, 2011, **45**, 9101-9108.
- S4. H. Sehaqui, M. E. Gálvez, V. Becatinni, Y. Cheng Ng, A. Steinfeld, T. Zimmermann and P. Tingaut, *Environmental Science Technology*, 2015, **49**, 3167-3174.
- S5. F. Valdebenito, R. García, K. Cruces, G. Ciudad, G. Chinga-Carrasco and Y. Habibi, *ACS Sustainable Chemistry Engineering*, 2018, **6**, 12603-12612.
